# Supplementary material for: Clinical trials in Lusophone Africa – results from a capacity building training initiative
Source: Research Square preprint supplement (doi:10.21203/rs.3.rs-8065478/v1), 2025-12-30
Supplement: Supplementary file 1 [file 6d7fd13c51c9ba7361ad7358.docx]

**Annex**:

**Annex 1 – Training Syllabus**

| **CONTENTS and SCHEDULE – ASSESSMENT METHODS** | **No. of hours: 111** |
| --- | --- |
| **Training Programme: Tuesdays and Thursdays; starting at 15:00 GMT.**  **Sessions: Theoretical-practical Sessions + Workshops**  **Assessment:**  The assessment consists of a multiple-choice test for each module, composed of 12 to 20 questions, each with 5 answer options, to be taken online and starting in the last hour of the workshop day. The duration will be 30 to 60 minutes (with a 10-minute grace period), depending on the number of questions in the test.  The trainee must pass all modules. If a trainee does not pass a module, they will be invited to complete a short recovery assignment (approximately 2,500 characters) about that module. The final assessment – pass or fail – will be conducted by the deadline of 31 July.  **Accreditation: 12** **ECTS** (NOVA Medical School (NMS) of the NOVA University of Lisbon + Faculty of Pharmacy of the University of Lisbon (FFUL) | |

| **1. Science and Ethics: Their Relationship**  **1.1.** *(3 December 2024, 3hrs)* Science, Technology and Ethics  - The relationship between Ethics, Science and Technology: a historical retrospective  - Ways of intervention of ethics in the field of Science and Technology  - The emergence of Applied Ethics: genealogy and evolving challenges of ethics applied to biomedicine (bioethics)    **1.2.** *(10 December 2024, 3hrs)* Applied Ethics to Biomedicine  - From practice to theory  - Some models of Bioethics theorisation: core principles  - Ethical analysis: between principles, norms and cases    **1.3.** *(17 December 2024, 3hrs)* Ethical Deliberation  - Notion of Dilemma  - Requirements for Deliberation  - Confirmation of the decision  ***Trainer (all sessions):*** *M. Patrão Neves | University of the Azores | Academic Background: Philosophy*    **1.4.** *(7 January 2025, 3hrs)* ***Workshop*** about Fundamental Principles of Biomedicine in the PSAC  ***Moderator:*** *M. Patrão Neves*  ***Participants from the PSAC:***   - *Cape Verde: José António Reis | National Ethics Committee for Health Research of Cape Verde (CNEPS) | Academic background: Psychology* - *Guinea-Bissau: Mouhammed Djicó | National Health Research Ethics Committee of Guinea-Bissau (CNEPS) | Academic background: Social Sciences* - *Mozambique: Esperança Sevene | National Committee for Bioethics in Health (CNBS) | Academic background: Medicine* - *São Tomé and Príncipe: Eula Maquengo | Health Ethics Committee for Scientific Research (CESIC) | Academic background: Medicine*   **Assessment Test** |
| --- |
| 1. **Research Integrity and Good Clinical Practice Requirements**   **2.1**. *(9 and 16 January 2025, 4hrs)* Scientific Integrity and Responsible Research Conduct  ***Trainers:*** *M. Patrão Neves and Maria Alexandra Ribeiro | NOVA Medical School (NMS) | Academic background: Biology and Bioethics*    **2.2.** *(23 January 2025, 4hrs)* Good Clinical Practice Requirements: ICH-GCP and ISO Standards  ***Trainer:*** *Maria Alexandra Ribeiro*    **2.3**. *(30 January 2025, 4hrs)* Communication in Science and Biomedical Research  - Communicating Science  - Registration of Clinical Studies  - Publication and Dissemination of Research Results  ***Trainers:*** *Maria Alexandra Ribeiro and António Granado | Faculty of Social and Human Sciences (FSCH) | Academic background: Modern Languages and Literatures*    **2.4**. *(04 February 2025, 3hrs)* **Workshop** about Scientific Integrity and Good Research Practices in the PSAC  ***Moderator:*** *Maria Alexandra Ribeiro*  ***Participants from the PSAC:***   - *Cape Verde: Isabel Araújo | University of Cape Verde (UniCV) | Academic background: Biomedicine* - *Guinea-Bissau: Cesário Martins | Bandim Health Project (PSB) | Academic background: Medicine* - *Mozambique: Vasco Muchanga | Faculty of Medicine, Eduardo Mondlane University | Academic background: Sociology*   **Assessment Test** |
| 1. **International Bioethics Institutions and Guidelines for Research and Health-Related Practices**    1. *(6 and 13 February 2025, 4hrs)* Institutionalisation and Internationalisation of Bioethics   - The different bodies: nature and function  - The key international declarations  ***Trainers:*** *M. Patrão Neves e Maria Alexandra Ribeiro*     - 1. *(20 February 2025, 4hrs)* Ethical Principles of Clinical Research   ***Trainer:*** *Maria Alexandra Ribeiro*   - 1. *(27 February 2025, 4hrs)* Clinical Research and Health Infrasctuctures   - Life cycle of a clinical study  - Requirements of trial centres, support structures and quality management  - National and international organisational models: the example of an academic CRO  ***Trainers:*** *Lúcia Domingues | NMS | Academic background: Biomedicine and Sara Maia | NMS | Academic background: Biomedical sciences*     - 1. *(5 March 2025, 3hrs)* **Workshop** aboutResearch Institutions in the PSAC   ***Moderator:*** *Emília Monteiro |**NMS | Academic background: Medicine*  ***Participants from the PSAC:***   - *Angola: Joana Paixão | National Institute of Health Research (INS) | Academic background: Epidemiology* - *Cape Verde: Maria da Luz Lima | National Institute of Public Health (INSP) | Academic background: Medicine* - *Guinea-Bissau: Francisco Samory Levy | National Institute of Public Health (INASA) | Academic background: Medicine* - *São Tomé and Príncipe: Yardlene Sequeira | National Reference Laboratory for Tuberculosis and COVID-19 | Academic background: Clinical Analysis and Public Health*   **Assessment Test** |
| 1. **Public Health Issues and Infectious Diseases**    1. *(6 and 13 March 2025, 4hrs)* Public Health   - Ethical, legal and political aspects in public health  - Foundations and strategies for action and planning in public health  - Infectious diseases and vectors – the REVIVE example  ***Trainers:*** *Ana Paula Rodrigues | National Institute of Health Doutor Ricardo Jorge (INSA) | Academic background: Medicine and Maria João Alves | INSA | Academic background: Microbiology*     - 1. *(20 March 2025)* Epidemiology and Research   - Introduction and methods in epidemiology  - Demographic, genetic and environmental factors in disease distribution  - Epidemiological surveillance and reserach  ***Trainer:*** *Ana Rodrigues | NMS | Academic background: Medicine*     - 1. *(25 and 27 March 2025, 4hrs)* Research Methods in Health   - General concepts and definitions in clinical research  - Types of clinical studies and study design  - Specific features of experimental clinical studies involving medicinal products, devices, nutrition and surgery  ***Trainer:*** *Emília Monteiro*     - 1. *(01 April 2025, 3hrs)* **Workshop** about Emerging Human and Animal Diseases   ***Moderator:*** *M. Patrão Neves and Sofia Núncio |**INSA | Academic background: Biology*  ***Participants from the PSAC:***   - *Angola: Maria Cecília Almeida | Ministry of Health | Academic background: Medicine* - *Cape Verde: Lara Gómez | Jean Piaget University of Cape Verde | Academic background: Biology* - *Guinea-Bissau: Inácio Alvarenga | World Health Organization (WHO) | Academic background: Medicine* - *Mozambique: Osvaldo Frederico | National Institute of Health (INS) | Academic background: Veterinary Medicine* - *São Tomé and Príncipe: Adionilde Aguiar | Ministry of Health – National Reference Laboratory for TB/HIV and COVID-19 – Health Delegate and CUF (Portugal) | Academic background: Medicine*     **Assessment Test** |
| 1. **Biobanks and Responsible Research Involving Humans, Fauna and Flora, and Patentable Innovation**     1. *(03 April 2025, 4hrs)* Biobanks: Ethical, Legal, and Social Framework   - European Regulatory System  - Informed consent and privacy  - The importance of biobanks for biomedical research  ***Trainer:*** *Célia Ventura | INSA | Academic background: Clinical Analysis and Public Health*     - 1. *(10 April 2025, 4hrs) Organisation of a Biobank: Planning and Management of Human Biological Samples*   - Collection, processing and storage of biological samples  - Sample and data management in the biobank  - Quality management, access, use and sharing of biobank samples  ***Trainer:*** *Maria Assunção | NMS | Academic background: Molecular Cell Biology*     - 1. *(17 April 2025, 4hrs)* Biological Sample Banks of Animal or Plant Origin and Biomedical Research   ***Trainer:*** *Ana Paula Arez | Institute of Hygiene and Tropical Medicine (IHMT) | Academic background: Biology*     - 1. *(24 April 2025, 4hrs)* Research, Innovation, and Development: Intellectual Property and Patents   ***Trainer:*** *Diogo Antunes | Inventa International S.A | Academic background: Law*     - 1. *(6 May 2025, 3hrs)* ***Workshop*** about Research involving biological samples of animal and plant origin in biomedicine   ***Moderators:*** *M. Patrão Neves and Lúcia Domingues*  ***Participants from the PSAC:***   - *Guinea-Bissau: Bucar Indjai | National Institute of Studies and Research (INEP) | Academic background: Anthropology* - *Mozambique: Nidia Cangi Vaz | Eduardo Mondlane University | Academic background: Biology* - *São Tomé and Príncipe: Miclay Carvalho | Agronomic and Technological Research Centre of São Tomé and Príncipe | Academic background: Agronomic Engineering*   **Assessment Test** |
| 1. **Regulatory Affairs**     1. *(08 and 15 May 2025, 4hrs)* Principles of Regulation for Medicinal Products and Health Products: The Role of Regulatory Authorities   - European and Portuguese Regulatory Systems  - Marketing authorisation procedures  - Medicinal products and health products: medicinal products, traditional herbal medicinal products (including cannabis-based medicinal products), generic medicinal products and biosimilars, advanced therapy medicinal products, cosmetics, food supplements and plant -based functional foods  ***Trainers:*** *Beatriz Lima | Faculty of Pharmacy, University of Lisbon (FFUL) | Academic Background: Pharmaceutical Sciences; Isabel Vieira | INFARMED, I.P | Academic Background: Pharmaceutical Sciences; Helena Ribeiro | FFUL | Academic Background: Academic Background; Rosário Lobato | FFUL | Academic Background: Pharmaceutical Sciences e Olga Silva | FFUL | Academic Background: Pharmaceutical Sciences*     - 1. *(22 May 2025, 4hrs)* Clinical Trials with Medicinal Products   - Ethical and regulatory aspects  - The European approval system  ***Trainers:*** *Cecília Lima | INFARMED, I.P | Academic Background: Pharmaceutical Sciences e Leonor Nogueira | INFARMED, I.P. | Academic Background: Pharmaceutical Sciences*     - 1. *(29 May 2025, 4hrs) Risk Management System*   - Evaluation and safety monitoring of medicinal products and pharmacovigilance  - Post-authorisation studies and monitoring of medical devices  ***Trainers:*** *Diogo Almeida | FFUL | Background: Pharmaceutical Sciences; Carla Torre | FFUL | Academic Background: Pharmaceutical Sciences*     - 1. *(03 june 2025, 3hrs) Workshop about International Regulatory Systems*   ***Moderation:*** *Bruno Sepodes | European Medicines Agency (EMA) | Academic Background: Pharmaceutical Sciences e Djamila Reis | OMS | Academic Background: Pharmaceutical Sciences*  ***Participants from the PSAC:***   - *Cape Verde: Eduardo Tavares | Independent Health Regulatory Authority**(ERIS) | Academic Background: Pharmaceutical Sciences* - *Mozambique: Tânia Sitoie | National Medicines Regulatory Authority (ANARME, I.P.) | Academic Background: Pharmaceutical Sciences* - *São Tomé and Príncipe: Hironisia dos Santos |* *Ministry of Health of São Tomé and Príncipe | Academic Background: Pharmaceutical Sciences*   **Assessment Test** |

**Annex 2 – Quality Assurance questionnaires**

Extended table from which Table 8 was built presenting the average trainee ratings for questions 1 to 17, aggregated by category, per module.


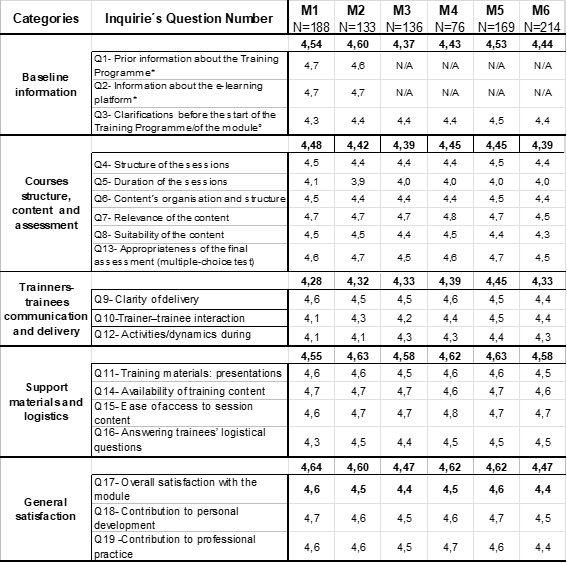


**Annex 3 – Training Programme survey**

| Training Programme Survey |
| --- |
| 1. How would you rate the Training Programme overall?  (0 - Not satisfactory; 1 - Somewhat satisfactory; 2 - Satisfactory; 3 - Good; 4 - Very good; 5 - Excellent)  2. How would you rate the direct impact that the Training Programme had on your professional practice?  (0 - None; 1 - Minimal; 2 - Reasonable; 3 - Moderate; 4 - High; 5 - Very high)  3. If it had any impact, please specify what it was.  (Free text) |
